# Supplementary material for: Phenethylamine in chlorella alleviates high-fat diet-induced mouse liver damage by regulating generation of methylglyoxal
Source: PubMed Central journal article supplement (PMC8302609; doi:10.1038/s41538-021-00105-3), 2021-07-23
Supplement: 41538_2021_105_MOESM2_ESM.pdf [file 41538_2021_105_MOESM2_ESM.pdf]

## Reporting Summary

Nature Portfolio wishes to improve the reproducibility of the work that we publish. This form provides structure for consistency and transparency in reporting. For further information on Nature Portfolio policies, see our [Editorial Policies](#) and the [Editorial Policy Checklist](#).

### Statistics

For all statistical analyses, confirm that the following items are present in the figure legend, table legend, main text, or Methods section.

n/a Confirmed

- The exact sample size ( $n$ ) for each experimental group/condition, given as a discrete number and unit of measurement
- A statement on whether measurements were taken from distinct samples or whether the same sample was measured repeatedly
- The statistical test(s) used AND whether they are one- or two-sided  
*Only common tests should be described solely by name; describe more complex techniques in the Methods section.*
- A description of all covariates tested
- A description of any assumptions or corrections, such as tests of normality and adjustment for multiple comparisons
- A full description of the statistical parameters including central tendency (e.g. means) or other basic estimates (e.g. regression coefficient) AND variation (e.g. standard deviation) or associated estimates of uncertainty (e.g. confidence intervals)
- For null hypothesis testing, the test statistic (e.g.  $F$ ,  $t$ ,  $r$ ) with confidence intervals, effect sizes, degrees of freedom and  $P$  value noted  
*Give  $P$  values as exact values whenever suitable.*
- For Bayesian analysis, information on the choice of priors and Markov chain Monte Carlo settings
- For hierarchical and complex designs, identification of the appropriate level for tests and full reporting of outcomes
- Estimates of effect sizes (e.g. Cohen's  $d$ , Pearson's  $r$ ), indicating how they were calculated

*Our web collection on [statistics for biologists](#) contains articles on many of the points above.*

### Software and code

Policy information about [availability of computer code](#)

Data collection

Data analysis

For manuscripts utilizing custom algorithms or software that are central to the research but not yet described in published literature, software must be made available to editors and reviewers. We strongly encourage code deposition in a community repository (e.g. GitHub). See the Nature Portfolio [guidelines for submitting code & software](#) for further information.

### Data

Policy information about [availability of data](#)

All manuscripts must include a [data availability statement](#). This statement should provide the following information, where applicable:

- Accession codes, unique identifiers, or web links for publicly available datasets
- A description of any restrictions on data availability
- For clinical datasets or third party data, please ensure that the statement adheres to our [policy](#)

The data supporting the findings reported herein are available on reasonable request from the corresponding author. Data are not stored in publicly available datasets.

## Field-specific reporting

Please select the one below that is the best fit for your research. If you are not sure, read the appropriate sections before making your selection.

- Life sciences       Behavioural & social sciences       Ecological, evolutionary & environmental sciences

For a reference copy of the document with all sections, see [nature.com/documents/nr-reporting-summary-flat.pdf](https://www.nature.com/documents/nr-reporting-summary-flat.pdf)

## Life sciences study design

All studies must disclose on these points even when the disclosure is negative.

|                 |                                                                                                                                                                                                                                                                                                       |
|-----------------|-------------------------------------------------------------------------------------------------------------------------------------------------------------------------------------------------------------------------------------------------------------------------------------------------------|
| Sample size     | We carried preliminary experiments using 6 animals (3 animal in same cage) for each group under similar condition. We got statistically significance. Thus, we chose 6 animals for each group.                                                                                                        |
| Data exclusions | No data exclusion.                                                                                                                                                                                                                                                                                    |
| Replication     | As mentioned before, we carried preliminary experiment and obtained similar results.                                                                                                                                                                                                                  |
| Randomization   | Mice with same age and similar body weigh were obtained from same supplier. Subsequently, the mice were randomly divided into the following four groups (n = 6).                                                                                                                                      |
| Blinding        | For the LC-MS/MS analysis, samples were randomly analyzed. However, for western blot analysis, samples were arranged control, treated, control, treated...to make easy comparison. Thus, investigator could realize which sample. However, image data are presented in Figure to confirm rationality. |

## Reporting for specific materials, systems and methods

We require information from authors about some types of materials, experimental systems and methods used in many studies. Here, indicate whether each material, system or method listed is relevant to your study. If you are not sure if a list item applies to your research, read the appropriate section before selecting a response.

### Materials & experimental systems

| n/a                                 | Involved in the study                                           |
|-------------------------------------|-----------------------------------------------------------------|
| <input type="checkbox"/>            | <input checked="" type="checkbox"/> Antibodies                  |
| <input checked="" type="checkbox"/> | <input type="checkbox"/> Eukaryotic cell lines                  |
| <input checked="" type="checkbox"/> | <input type="checkbox"/> Palaeontology and archaeology          |
| <input type="checkbox"/>            | <input checked="" type="checkbox"/> Animals and other organisms |
| <input checked="" type="checkbox"/> | <input type="checkbox"/> Human research participants            |
| <input checked="" type="checkbox"/> | <input type="checkbox"/> Clinical data                          |
| <input checked="" type="checkbox"/> | <input type="checkbox"/> Dual use research of concern           |

### Methods

| n/a                                 | Involved in the study                           |
|-------------------------------------|-------------------------------------------------|
| <input checked="" type="checkbox"/> | <input type="checkbox"/> ChIP-seq               |
| <input checked="" type="checkbox"/> | <input type="checkbox"/> Flow cytometry         |
| <input checked="" type="checkbox"/> | <input type="checkbox"/> MRI-based neuroimaging |

## Antibodies

|                 |                                                                                                                                                                                                                                                                                                                                                                                                                                                   |
|-----------------|---------------------------------------------------------------------------------------------------------------------------------------------------------------------------------------------------------------------------------------------------------------------------------------------------------------------------------------------------------------------------------------------------------------------------------------------------|
| Antibodies used | Rabbit immunoglobulin G (IgG) against mouse SOD-1 (ab183881) and GPX-1 (ab22604) were obtained from Abcam (Cambridge, UK). Mouse anti-GAPDH (60004-1-Ig) and $\beta$ -actin (sc-81178) monoclonal antibodies, were obtained from Proteintech (Chicago, IL, USA) and Santa Cruz Biotechnology. Goat horseradish peroxidase (HRP)-conjugated rabbit (#7074) and mouse IgGs (#7076) were obtained from Cell Signaling Technology (Danvers, MA, USA). |
| Validation      | On the manufacturer's website.                                                                                                                                                                                                                                                                                                                                                                                                                    |

## Animals and other organisms

Policy information about [studies involving animals](#); [ARRIVE guidelines](#) recommended for reporting animal research

|                         |                                                                                                                                                                                                                                                                                                                    |
|-------------------------|--------------------------------------------------------------------------------------------------------------------------------------------------------------------------------------------------------------------------------------------------------------------------------------------------------------------|
| Laboratory animals      | Male C57BL/6J mice (aged 7 weeks; bodyweight, 21–23 g) were purchased from Japan SLC (Shizuoka, Japan).                                                                                                                                                                                                            |
| Wild animals            | This study did not use wild animal.                                                                                                                                                                                                                                                                                |
| Field-collected samples | This study did not use sample collected from field.                                                                                                                                                                                                                                                                |
| Ethics oversight        | All animal experiments were performed according to the guidelines of the National Institutes of Health for the use of experimental animals. The experimental procedures were performed at the Louis Pasteur Center for Medical Research (Kyoto, Japan) and were approved by its Animal Care Committee (No. 20192). |

Note that full information on the approval of the study protocol must also be provided in the manuscript.
